# Supplementary material
Source: PubMed Central journal article supplement (PMC2840613)

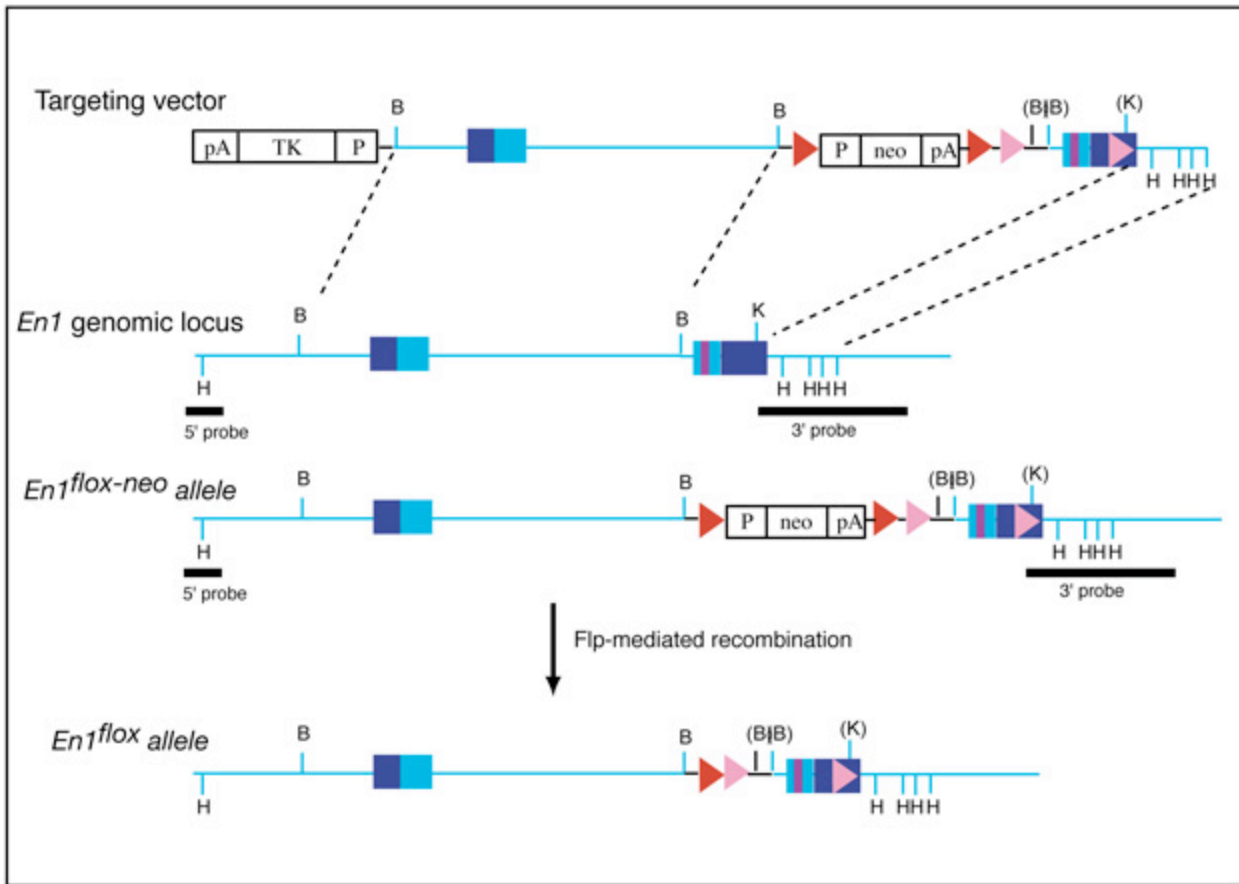

Supplement: NIHMS184328-supplement-S_Fig__1.pdf [file NIHMS184328-supplement-S_Fig__1.pdf]
